# Supplementary material for: RNA-Sequencing Reveals Upregulation and a Beneficial Role of Autophagy in Myoblast Differentiation and Fusion
Source: MDPI journal article supplement (doi:10.3390/cells11223549), 2022-11-10
Supplement: s1 [file s1]

**Table S1.** Summary of RNA sequencing and mapping results.

| RNA-seq Library | Raw Reads | Trimmed Reads | Total Reads | Mapped | Total Rate | Mapping | Uniquely Mapping Rate | Uniquely Mapped Reads |
|-----------------|-----------|---------------|-------------|--------|------------|---------|-----------------------|-----------------------|
| C2A1            | 48893870  | 47432376      | 43818358    |        | 92.38%     |         | 41821598              | 88.17%                |
| C2A2            | 51693558  | 50472662      | 45899728    |        | 90.94%     |         | 43894184              | 86.97%                |
| C2A3            | 59952808  | 58406158      | 53085534    |        | 90.89%     |         | 50848798              | 87.06%                |
| C2A4            | 42381668  | 41385146      | 38635612    |        | 93.35%     |         | 36969986              | 89.33%                |
| C2A5            | 43625236  | 42267268      | 39524602    |        | 93.51%     |         | 37748072              | 89.31%                |
| C2B1            | 56319126  | 55044342      | 50614278    |        | 91.95%     |         | 48421854              | 87.97%                |
| C2B2            | 52221498  | 50978384      | 46700452    |        | 91.61%     |         | 44836580              | 87.95%                |
| C2B3            | 45035416  | 43807398      | 40159780    |        | 91.67%     |         | 38608598              | 88.13%                |
| C2B4            | 45496936  | 44365806      | 40480144    |        | 91.24%     |         | 38874062              | 87.62%                |
| C2B5            | 42239522  | 41160068      | 37778122    |        | 91.79%     |         | 36293690              | 88.18%                |
